# Supplementary material for: Functional Consequences of the Macrophage Stimulating Protein 689C Inflammatory Bowel Disease Risk Allele
Source: PubMed Central journal article supplement (PMC3884107; doi:10.1371/journal.pone.0083958), 2013-12-23
Supplement: pone.0083958.s007.pdf [file pone.0083958.s007.pdf]

**Table S1. Human intestinal tissue used for analysis of RON expression**

| <b>Patient</b> | <b>Cohort</b>               | <b>Resected Tissue</b>                                 | <b>Assay</b>   |
|----------------|-----------------------------|--------------------------------------------------------|----------------|
| 1              | Control<br>(Diverticulitis) | Descending colon                                       | Flow           |
| 2              | UC                          | Ascending, transverse colon                            | Flow           |
| 3              | CD                          | Ascending, transverse colon                            | IHC, ISH, Flow |
| 4              | UC                          | Subtotal colectomy                                     | Flow           |
| 5              | CD                          | Subtotal colectomy                                     | IHC, ISH, Flow |
| 6              | CD                          | Terminal ileum                                         | Flow           |
| 7              | CD                          | Ileum, ascending, transverse, and<br>descending colon  | IHC, ISH       |
| 8              | UC                          | Ileoanal anastomosis, laproscopic<br>proctocolectomy   | IHC, ISH       |
| 9              | UC                          | 35 cm colon to analverge                               | IHC, ISH       |
| 10             | UC                          | 4.0 cm of ileum, 75.0 cm of colon                      | IHC, ISH       |
| 11             | UC                          | Total proctocolectomy, ileostomy                       | IHC, ISH       |
| 12             | UC                          | Subtotal colectomy                                     | IHC, ISH       |
| 13             | Control (Cancer)            | 10cm proximal and distal to tumor                      | IHC, ISH       |
| 14             | Control (Cancer)            | Anterior section of sigmoid colon                      | IHC, ISH       |
| 15             | Control (Cancer)            | Right hemicolectomy                                    | IHC, ISH       |
| 16             | Control (Cancer)            | Right hemicolectomy, terminal ileum                    | IHC, ISH       |
| 17             | CD                          | Abd colectomy, end ileostomy                           | IHC, ISH       |
| 18             | UC                          | Colon                                                  | IHC, ISH       |
| 19             | Control (Cancer)            | Right colon hemicolectomy, 5.3 cm of<br>terminal ileum | IHC, ISH       |
| 20             | UC                          | Total proctocolectomy, end ileostomy                   | IHC, ISH       |
| 21             | CD                          | Ileum and colon                                        | IHC, ISH       |
| 22             | UC                          | Distal sigmoid colon                                   | IHC, ISH       |
| 23             | CD                          | Colon                                                  | IHC, ISH       |
| 24             | CD                          | Colon and terminal ileum                               | IHC, ISH       |
| 25             | UC                          | 2.5 cm Ileum, 85 cm colon                              | IHC, ISH       |
| 26             | UC                          | Colon                                                  | IHC, ISH       |
| 27             | UC                          | Entire colon                                           | IHC, ISH       |
| 28             | Normal                      | na                                                     | IHC, ISH       |
| 29             | Control<br>(Diverticulitis) | na                                                     | IHC, ISH       |
| 30             | CD                          | na                                                     | IHC, ISH       |
| 31             | CD                          | Colon                                                  | IHC            |
| 32             | Control                     | Colon                                                  | ISH            |
